# Supplementary material for: Diversity of Pseudomonas aeruginosa Temperate Phages
Source: PubMed Central journal article supplement (PMC8865926; doi:10.1128/msphere.01015-21), 2022-02-23

**A.****Distribution of the Size of Prophage Clusters**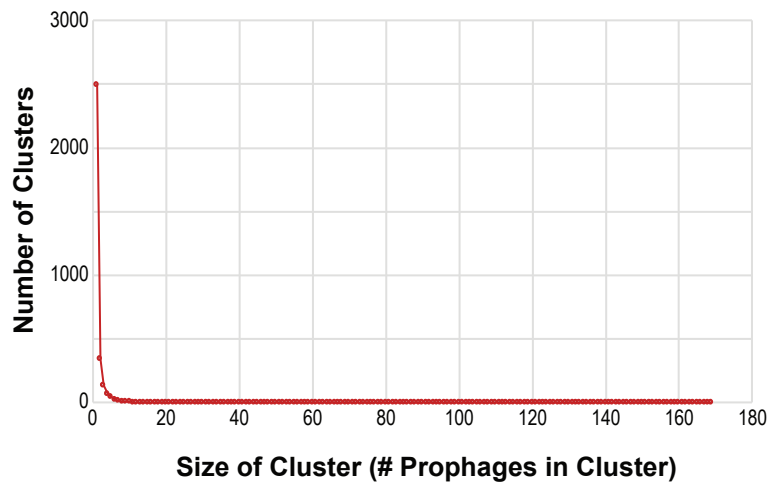**B.****ANI of *P. aeruginosa* Genome Assemblies Containing Prophage from Largest Cluster (n=169)**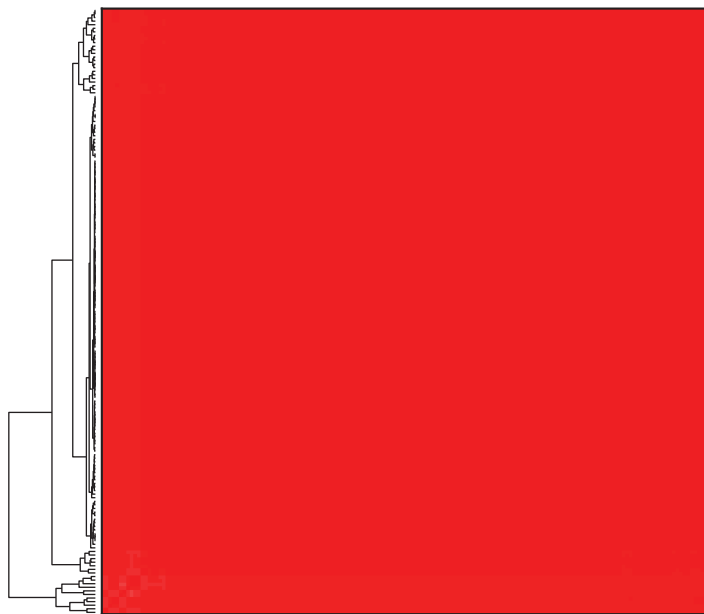**C.****ANI of *P. aeruginosa* Genome Assemblies Containing Prophage from Second Largest Cluster (n=126)**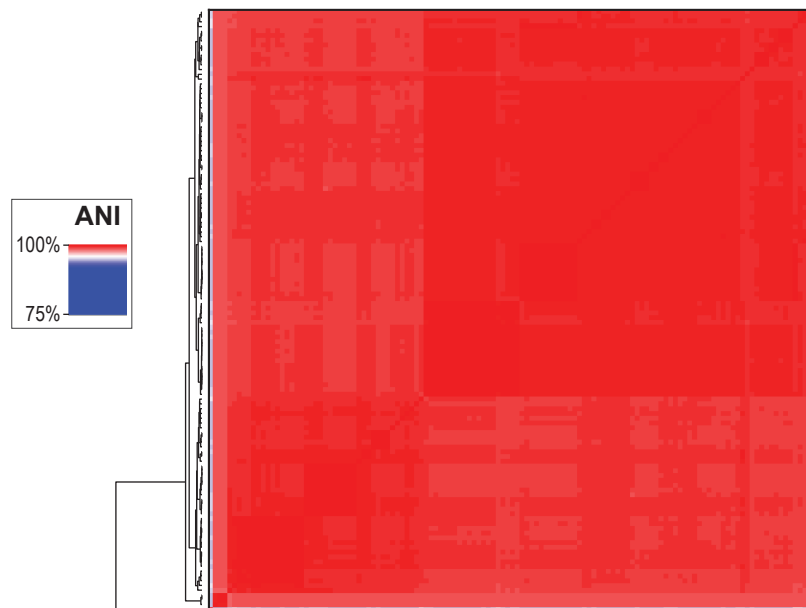

Supplement: msphere.01015-21-sf001.pdf [file msphere.01015-21-sf001.pdf]
