# Supplementary material for: Diversity of Pseudomonas aeruginosa Temperate Phages
Source: PubMed Central journal article supplement (PMC8865926; doi:10.1128/msphere.01015-21), 2022-02-23

Tree scale: 1 

-  Codes for an Integrase
-  Codes for a C repressor
-  Codes for Both

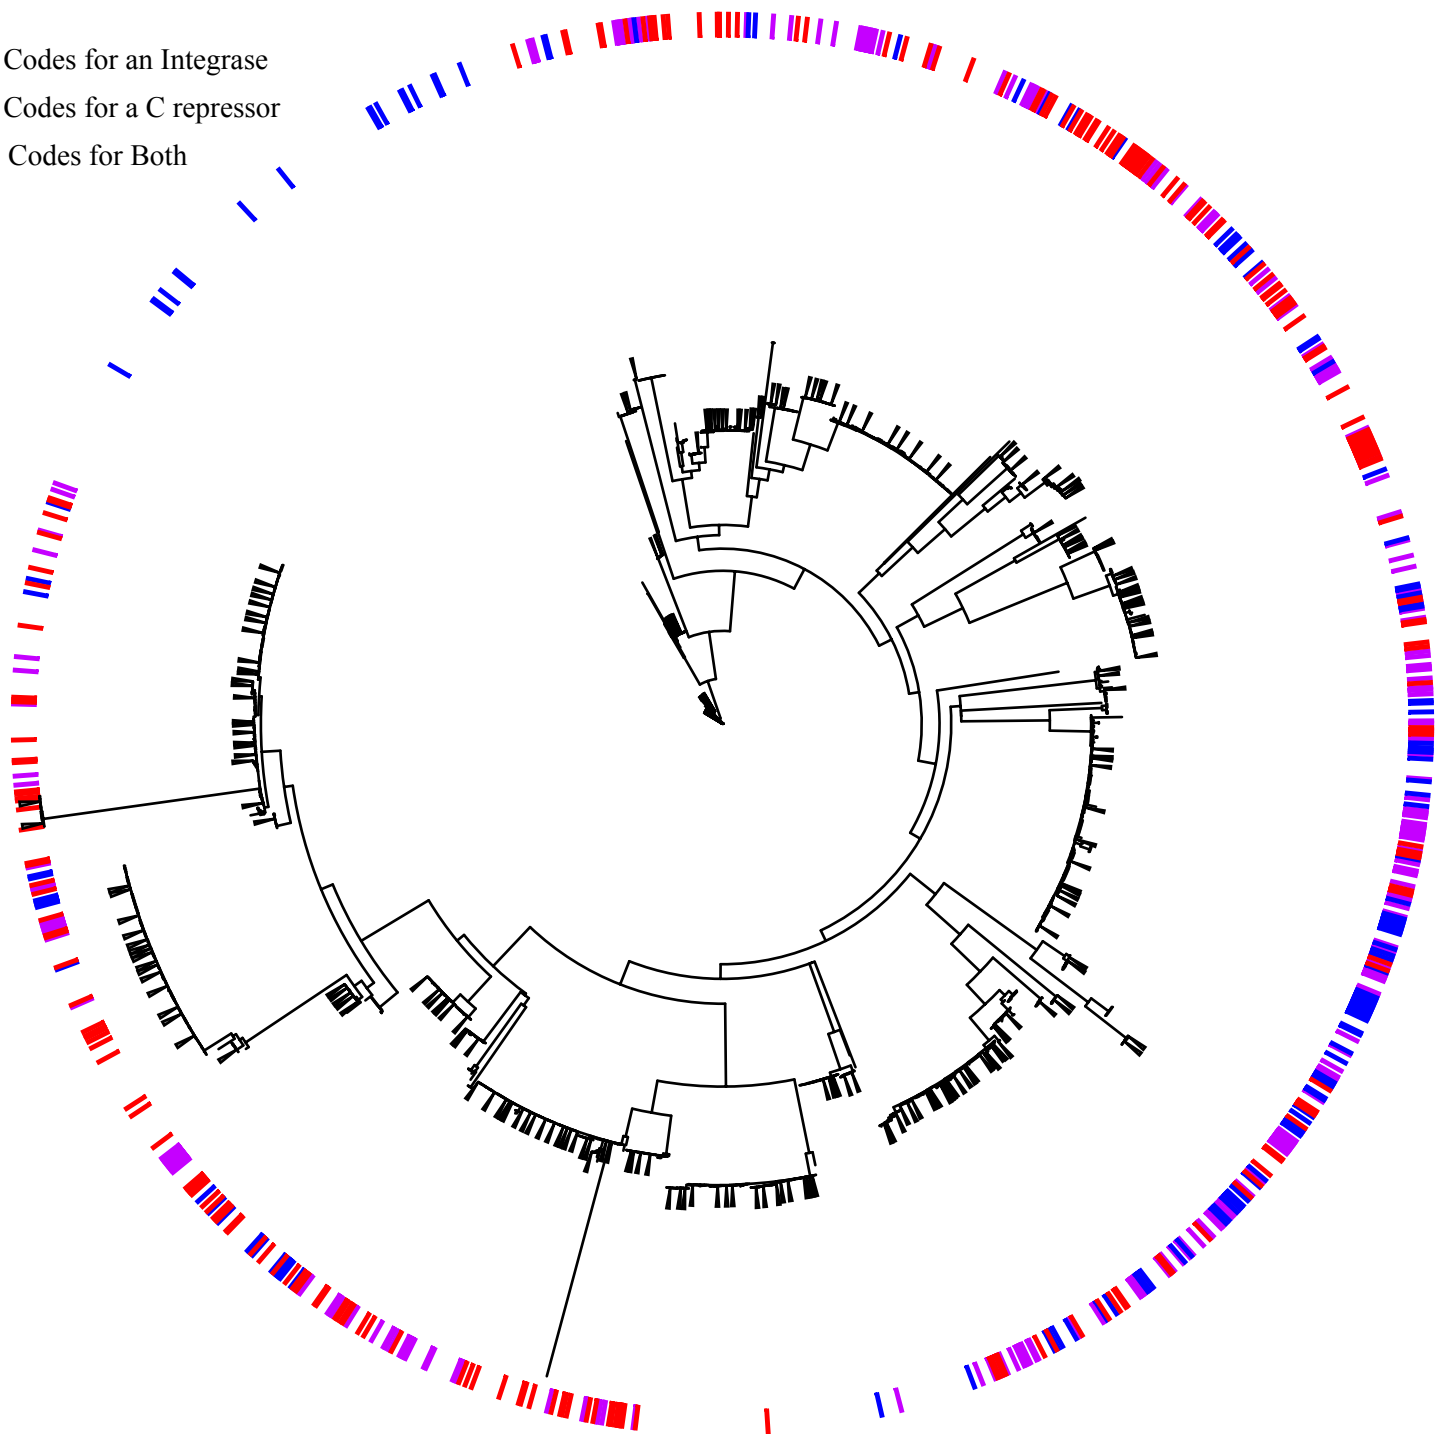

Supplement: msphere.01015-21-sf002.pdf [file msphere.01015-21-sf002.pdf]
